# Supplementary material for: Deciphering the loss of persistent red luminescence in ZnGa2O4:Cr3+upon Al3+substitution
Source: Royal Society of Chemistry journal article supplement (doi:10.1039/c8tc06373g), 2019-01-01
Supplement: c8tc06373g1.pdf [file c8tc06373g1.pdf]

## Deciphering the loss of persistent red luminescence in ZnGa<sub>2</sub>O<sub>4</sub>:Cr<sup>3+</sup> upon Al<sup>3+</sup> substitution

Erin Finley and Jakoah Brgoch\*

Department of Chemistry, University of Houston, Houston, TX 77204

### Supporting Information

**Table S1.** Rietveld Refinement Data for the End Members of Solid Solution from 11-BM Synchrotron X-Ray Diffraction

| Formula                                  | ZnGa <sub>2</sub> O <sub>4</sub> | ZnAl <sub>2</sub> O <sub>4</sub> |
|------------------------------------------|----------------------------------|----------------------------------|
| Radiation type, $\lambda$ (Å)            | 11-BM, 0.4126760                 |                                  |
| 2 $\theta$ range (°)                     | 0.5-50                           |                                  |
| Temperature (K)                          | 295                              |                                  |
| Space group; $Z$                         | $Fd\bar{3}m$ (No. 227); 8        |                                  |
| Lattice parameter, $a$ (Å)               | 8.334655(2)                      | 8.089110(3)                      |
| Volume (Å <sup>3</sup> )                 | 578.979(1)                       | 529.300(1)                       |
| Calculated Density (g cm <sup>-3</sup> ) | 6.6168                           | 4.601                            |
| Formula weight (g mol <sup>-1</sup> )    | 2150.528                         | 1466.720                         |
| $R_p$                                    | 0.1039                           | 0.0838                           |
| $R_{wp}$                                 | 0.1299                           | 0.1160                           |
| $\chi^2$                                 | 3.703                            | 6.926                            |

**Table S2** (a) Crystallographic Data of ZnGa<sub>2</sub>O<sub>4</sub> from Rietveld Refinement Resulting from 11-BM Synchrotron X-ray Diffraction Data, (b) Crystallographic Data of ZnAl<sub>2</sub>O<sub>4</sub> from Rietveld Refinement Resulting from 11-BM Synchrotron X-ray Diffraction Data

| Atom | Wyck. site | $x$        | $y$        | $z$        | $U_{iso}$ (Å <sup>2</sup> ) |
|------|------------|------------|------------|------------|-----------------------------|
| (a)  |            |            |            |            |                             |
| Zn   | 8a         | 1/8        | 1/8        | 1/8        | 0.009(5)                    |
| Ga   | 16d        | 1/2        | 1/2        | 1/2        | 0.009(3)                    |
| O    | 32e        | 0.26357(7) | 0.26357(7) | 0.26357(7) | 0.00116(2)                  |
| (b)  |            |            |            |            |                             |
| Zn   | 8a         | 1/8        | 1/8        | 1/8        | 0.00258(3)                  |
| Al   | 16d        | 1/2        | 1/2        | 1/2        | 0.00107(5)                  |
| O    | 32e        | 0.26332(4) | 0.26332(4) | 0.26332(4) | 0.00170(1)                  |

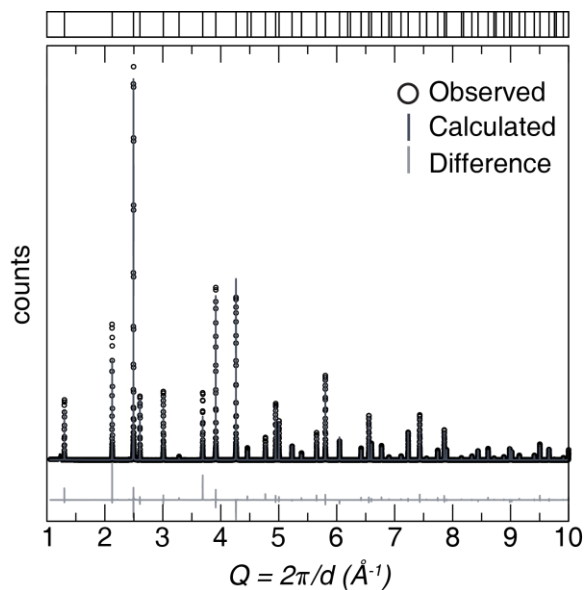

(a) ZnGa<sub>2</sub>O<sub>4</sub>

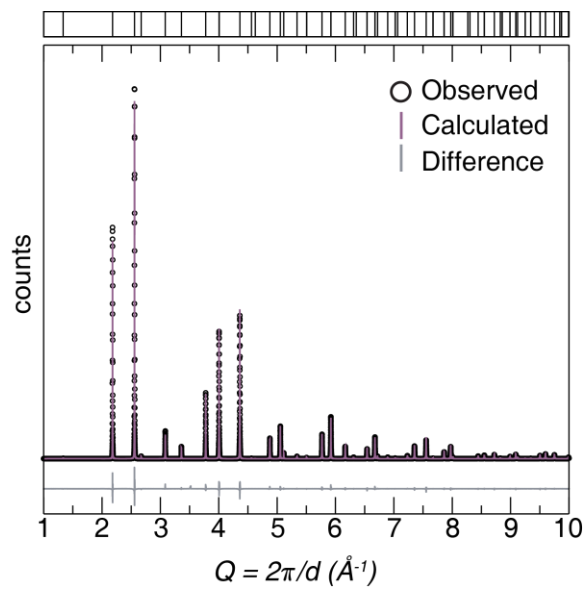

(b) Zn(Ga<sub>0.740(1)</sub>Al<sub>0.260(1)</sub>)<sub>2</sub>O<sub>4</sub>

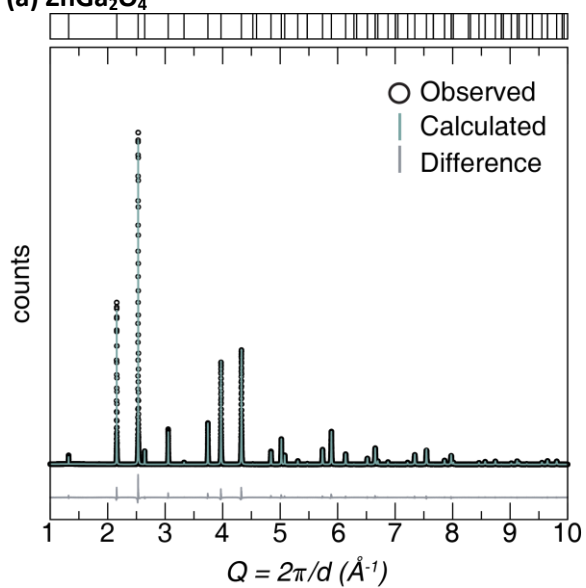

(c) Zn(Ga<sub>0.497(1)</sub>Al<sub>0.503(1)</sub>)<sub>2</sub>O<sub>4</sub>

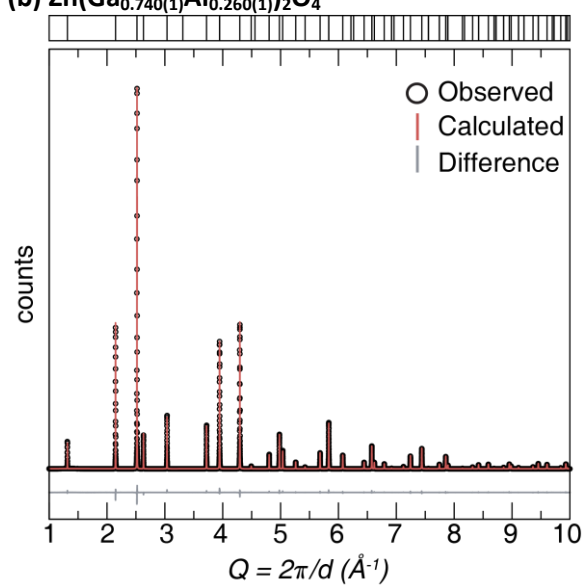

(d) Zn(Ga<sub>0.238(1)</sub>Al<sub>0.762(1)</sub>)<sub>2</sub>O<sub>4</sub>

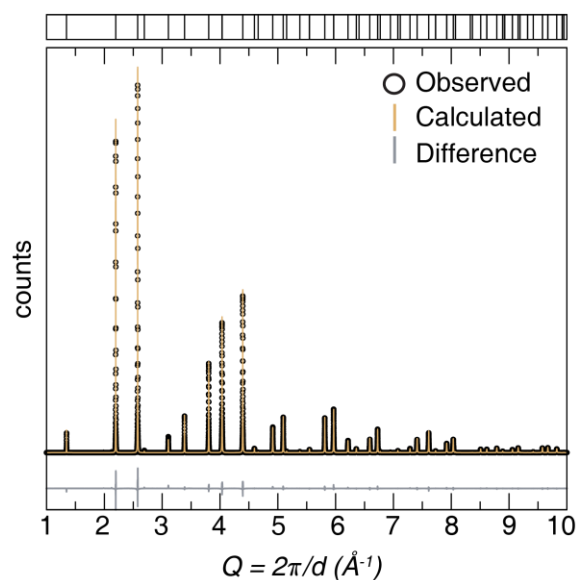

**(f) ZnAl<sub>2</sub>O<sub>4</sub>**

**Figure S1.** Rietveld refinement shown for (a)  $\delta = 0$ , (b)  $\delta = 0.25$ , (c)  $\delta = 0.50$ , (d)  $\delta = 0.75$ , and (f)  $\delta = 1$ . Experimental data is indicated by black circles, refinement is the solid color, and the difference is gray. Each refinement is in good agreement with the calculated pattern.

**Table S3. Rietveld Refinement of Zn(Ga<sub>1- $\delta$</sub> Al <sub>$\delta$</sub> )<sub>2</sub>O<sub>4</sub> ( $\delta = 0.25, 0.50, 0.75$ ) from 11-BM Synchrotron X-Ray Diffraction**

| Formula                                  | Zn(Ga <sub>0.740(1)</sub> Al <sub>0.260(1)</sub> ) <sub>2</sub> O <sub>4</sub> | Zn(Ga <sub>0.497(1)</sub> Al <sub>0.503(1)</sub> ) <sub>2</sub> O <sub>4</sub> | Zn(Ga <sub>0.238(1)</sub> Al <sub>0.762(1)</sub> ) <sub>2</sub> O <sub>4</sub> |
|------------------------------------------|--------------------------------------------------------------------------------|--------------------------------------------------------------------------------|--------------------------------------------------------------------------------|
| Radiation type, $\lambda$ (Å)            |                                                                                | 11-BM 0.4126760                                                                |                                                                                |
| $2\theta$ range (deg)                    |                                                                                | 0.5-50                                                                         |                                                                                |
| Temperature (K)                          |                                                                                | 295                                                                            |                                                                                |
| Space group; Z                           |                                                                                | $Fd\bar{3}m$ (No. 227); 8                                                      |                                                                                |
| Lattice parameters (Å)                   | $a = 8.274091(2)$                                                              | $a = 8.21351(2)$                                                               | $a = 8.150408(3)$                                                              |
| Volume (Å <sup>3</sup> )                 | 566.449(1)                                                                     | 554.098(3)                                                                     | 541.425(1)                                                                     |
| Calculated Density (g cm <sup>-3</sup> ) | 5.782                                                                          | 5.413                                                                          | 4.997                                                                          |
| Formula weight (g mol <sup>-1</sup> )    | 1972.508                                                                       | 1806.310                                                                       | 1629.164                                                                       |
| R <sub>p</sub>                           | 0.0604                                                                         | 0.0943                                                                         | 0.0848                                                                         |
| R <sub>wp</sub>                          | 0.0774                                                                         | 0.1480                                                                         | 0.1165                                                                         |
| $\chi^2$                                 | 2.0214                                                                         | 6.796                                                                          | 6.996                                                                          |

**Table S4. Crystallographic Data of Zn(Ga<sub>1- $\delta$</sub> Al <sub>$\delta$</sub> )<sub>2</sub>O<sub>4</sub> ( $\delta$  = 0.25, 0.50, 0.75) from Rietveld Refinement Resulting from 11-BM Synchrotron X-ray Diffraction Data**

| (a) Zn(Ga <sub>0.740(1)</sub> Al <sub>0.260(1)</sub> ) <sub>2</sub> O <sub>4</sub> |            |             |            |            |                                    |          |
|------------------------------------------------------------------------------------|------------|-------------|------------|------------|------------------------------------|----------|
| Atom                                                                               | Wyck. site | x           | y          | z          | U <sub>iso</sub> (Å <sup>2</sup> ) | Occup.   |
| Zn                                                                                 | 8a         | 1/8         | 1/8        | 1/8        | 0.00407(3)                         | 1        |
| Ga                                                                                 | 16d        | 1/2         | 1/2        | 1/2        | 0.00359(3)                         | 0.740(1) |
| Al                                                                                 | 16d        | 1/2         | 1/2        | 1/2        | 0.00271(3)                         | 0.260(1) |
| O                                                                                  | 32e        | 0.26357 (7) | 0.26357(7) | 0.26357(7) | 0.0068(1)                          | 1        |
| (b) Zn(Ga <sub>0.497(1)</sub> Al <sub>0.503(1)</sub> ) <sub>2</sub> O <sub>4</sub> |            |             |            |            |                                    |          |
| Zn                                                                                 | 8a         | 1/8         | 1/8        | 1/8        | 0.00314(7)                         | 1        |
| Ga                                                                                 | 16d        | 1/2         | 1/2        | 1/2        | 0.00249(7)                         | 0.497(1) |
| Al                                                                                 | 16d        | 1/2         | 1/2        | 1/2        | 0.00249(7)                         | 0.503(1) |
| O                                                                                  | 32e        | 0.26323(3)  | 0.26323(3) | 0.26323(3) | 0.0039(2)                          | 1        |
| (c) Zn(Ga <sub>0.238(1)</sub> Al <sub>0.762(1)</sub> ) <sub>2</sub> O <sub>4</sub> |            |             |            |            |                                    |          |
| Zn                                                                                 | 8a         | 1/8         | 1/8        | 1/8        | 0.00289(4)                         | 1        |
| Ga                                                                                 | 16d        | 1/2         | 1/2        | 1/2        | 0.00219(6)                         | 0.238(1) |
| Al                                                                                 | 16d        | 1/2         | 1/2        | 1/2        | 0.00219(6)                         | 0.762(1) |
| O                                                                                  | 32e        | 0.26332(4)  | 0.26332(4) | 0.26332(4) | 0.0044(1)                          | 1        |

Thermoluminescence spectra were fit to a Gaussian function using the Fit Peaks (Pro) tool available in OriginPro 8.6<sup>®</sup> software. The parameters used to satisfy Equation 9 are listed in Table S5 for  $T_m$  and  $\omega$ , where  $\omega$  is the full width at half maximum (FWHM) of each peak. The remaining parameters,  $k_B = 8.61733 \text{ e}^{-5} \text{ (eVK}^{-1}\text{)}$ ,  $\mu_g = 0.50$  for each peak. The fully deconvoluted TL spectra are found in Figure S2.

| <b>Table S5. Thermoluminescence Peak Fitting Parameters</b> |           |                 |        |
|-------------------------------------------------------------|-----------|-----------------|--------|
| $\delta$                                                    | $T_m$ (K) | $\omega$ (FWHM) |        |
| 0                                                           | 323       | 62.44           |        |
|                                                             | 324       | 169.90          |        |
|                                                             | 0.25      | 366             | 177.69 |
|                                                             | 413       | 114.18          |        |
| 0.50                                                        | 456       | 109.96          |        |
|                                                             | 132       | 30.71           |        |
|                                                             | 155       | 17.51           |        |
|                                                             | 169       | 43.71           |        |
|                                                             | 205       | 64.16           |        |
|                                                             | 421       | 107.85          |        |
|                                                             | 521       | 108.28          |        |

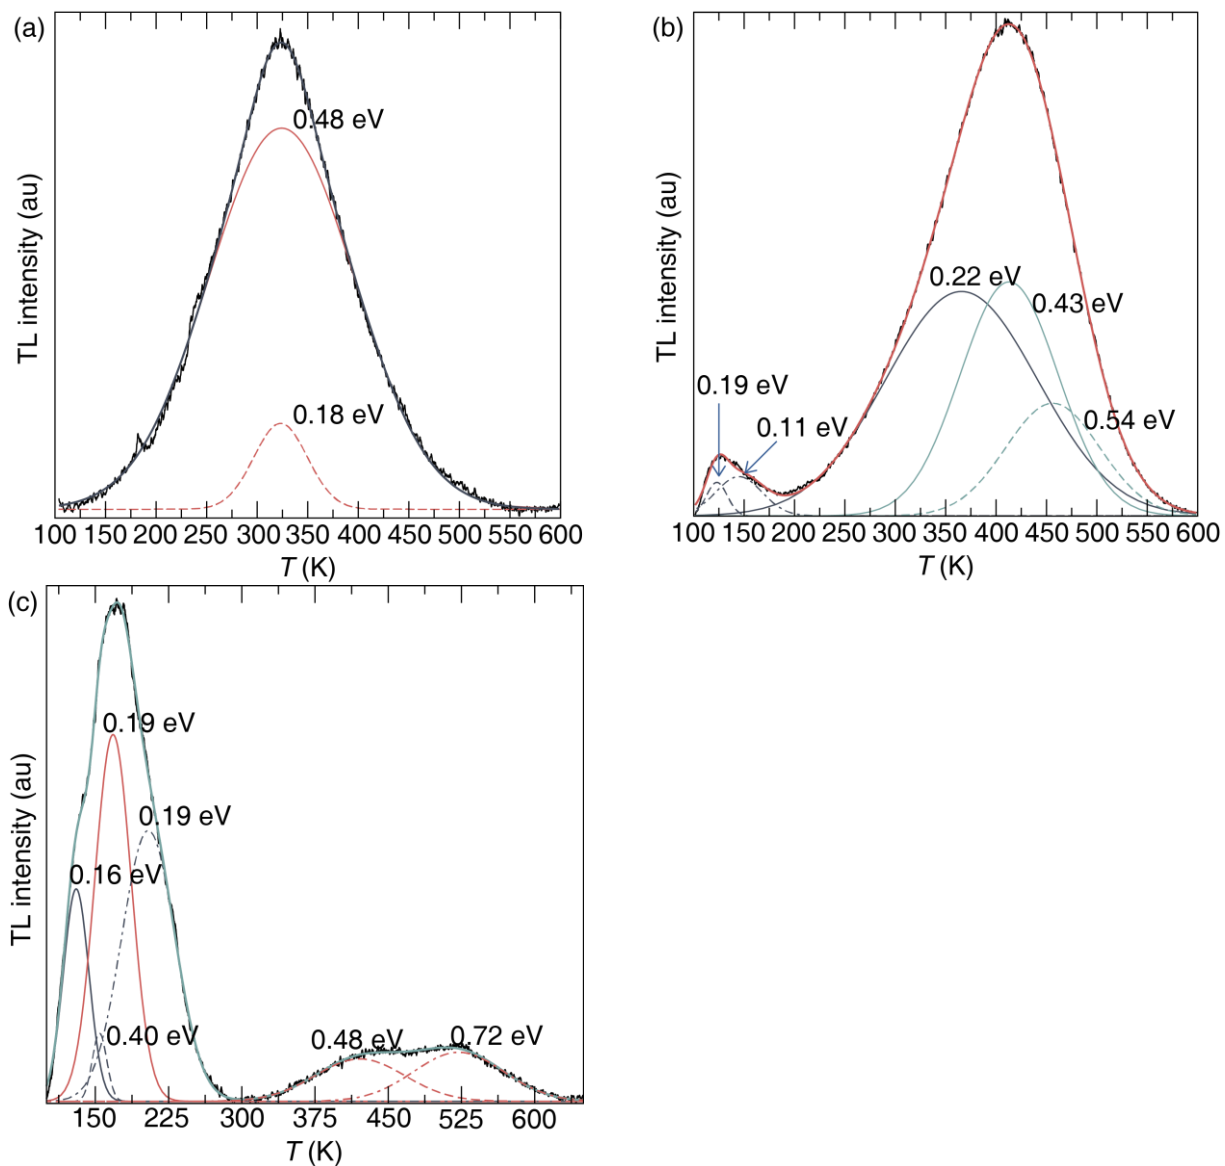

**Figure S2.** Thermoluminescence spectra showing the deconvolution of the trap states for  $\text{Zn}(\text{Ga}_{1-\delta}\text{Al}_{\delta})_2\text{O}_4:\text{Cr}^{3+}$  (a)  $\delta = 0$ , (b)  $\delta = 0.25$ , and (c)  $\delta = 0.50$ .
